# Supplementary material for: Modified-amino acid/peptide pyrimidine analogs: synthesis, structural characterization and DFT studies of N-(pyrimidyl)gabapentine and N-(pyrimidyl)baclofen
Source: Royal Society of Chemistry journal article supplement (doi:10.1039/d1nj04639j), 2021-01-01
Supplement: d1nj04639j1.pdf [file d1nj04639j1.pdf]

## ESI for manuscript entitled

Modified-amino acid/peptide pyrimidine analogs: Synthesis, structural characterization and DFT study of N-(pyrimidyl) gabapentine and N-(pyrimidyl)baclofen

by

Angel García-Raso<sup>a</sup>, Angel Terrón<sup>a</sup>, Juan J. Fiol<sup>a</sup>, Adela López-Zafra<sup>a</sup>, Bárbara Massanet, Antonio Frontera<sup>a,\*</sup>, Miquel Barceló-Oliver<sup>a,\*</sup>

*Departament de Química, Universitat de les Illes Balears, Crta. de Valldemossa km 7.5, 07122 Palma (Balears), Spain. E-mail: [toni.frontera@uib.es](mailto:toni.frontera@uib.es); [miquel.barcelo@uib.es](mailto:miquel.barcelo@uib.es)*

Compound 1

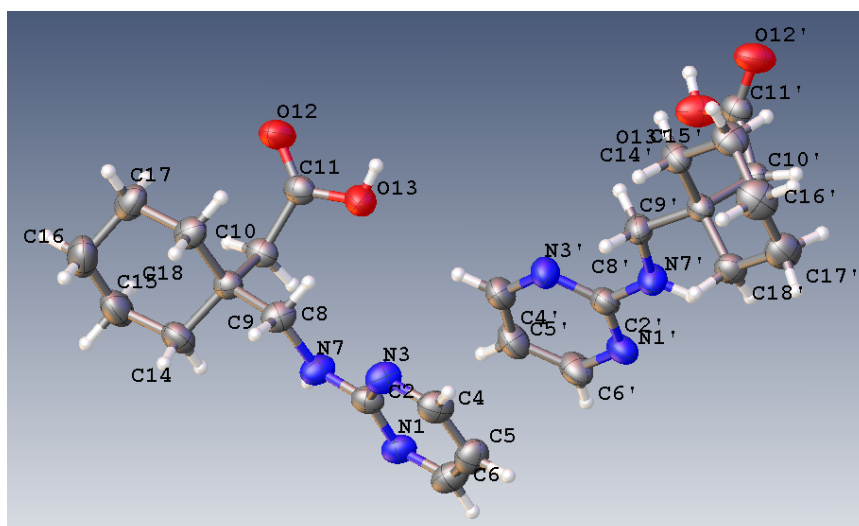

Fig. S1. ORTEP plot of compound 1 with atom numbering scheme

Table S1 Hydrogen Bonds for 1.

| D   | H    | A                 | d(D-H)/Å | d(H-A)/Å | d(D-A)/Å | D-H-A/° |
|-----|------|-------------------|----------|----------|----------|---------|
| O13 | H13  | N1 <sup>1</sup>   | 0.82     | 1.85     | 2.664(4) | 170.5   |
| O13 | H13  | N7 <sup>1</sup>   | 0.82     | 3.07     | 3.739(4) | 141.0   |
| N7  | H7   | O12 <sup>2</sup>  | 0.86     | 2.19     | 3.032(4) | 167.3   |
| N7  | H7   | O13 <sup>2</sup>  | 0.86     | 3.20     | 3.739(4) | 123.5   |
| C4  | H4   | O13 <sup>3</sup>  | 0.93     | 2.58     | 3.463(4) | 158.6   |
| C5  | H5   | O13 <sup>12</sup> | 0.93     | 2.95     | 3.741(5) | 143.9   |
| C6  | H6   | N3 <sup>4</sup>   | 0.93     | 2.81     | 3.439(4) | 125.6   |
| C6  | H6   | N3 <sup>12</sup>  | 0.93     | 2.72     | 3.489(4) | 140.8   |
| C8  | H8B  | N1 <sup>5</sup>   | 0.97     | 3.05     | 3.859(4) | 141.3   |
| C10 | H10A | O12 <sup>2</sup>  | 0.97     | 2.93     | 3.754(4) | 144.0   |
| C14 | H14B | O12 <sup>2</sup>  | 0.97     | 2.78     | 3.691(5) | 157.6   |

|      |      |                   |      |      |          |       |
|------|------|-------------------|------|------|----------|-------|
| C17  | H17B | O12               | 0.97 | 2.82 | 3.471(5) | 124.8 |
| C18  | H18A | O12 <sup>3</sup>  | 0.97 | 3.01 | 3.899(4) | 152.2 |
| O13' | H13' | N1 <sup>16</sup>  | 0.82 | 1.85 | 2.653(4) | 164.9 |
| O13' | H13' | N7 <sup>16</sup>  | 0.82 | 3.10 | 3.741(4) | 136.7 |
| N7'  | H7'  | O12 <sup>17</sup> | 0.86 | 2.18 | 3.029(4) | 167.3 |
| N7'  | H7'  | O13 <sup>17</sup> | 0.86 | 3.20 | 3.741(4) | 123.3 |
| C4'  | H4'  | O13               | 0.93 | 2.59 | 3.468(4) | 158.4 |
| C5'  | H5'  | O13 <sup>2</sup>  | 0.93 | 2.94 | 3.737(5) | 144.3 |
| C6'  | H6'  | N3 <sup>2</sup>   | 0.93 | 2.70 | 3.471(4) | 141.4 |
| C6'  | H6'  | N3 <sup>12</sup>  | 0.93 | 2.82 | 3.439(4) | 124.8 |
| C8'  | H8'A | N1 <sup>11</sup>  | 0.97 | 3.05 | 3.859(4) | 142.1 |
| C10' | H10D | O12 <sup>17</sup> | 0.97 | 2.92 | 3.742(4) | 143.8 |
| C14' | H14D | O12 <sup>13</sup> | 0.97 | 3.01 | 3.897(4) | 153.0 |
| C15' | H15C | O12 <sup>1</sup>  | 0.97 | 2.84 | 3.481(5) | 124.6 |
| C18' | H18D | O12 <sup>17</sup> | 0.97 | 2.74 | 3.660(4) | 158.6 |

Symmetry codes: <sup>1</sup>+X,1-Y,-1/2+Z; <sup>2</sup>+X,1-Y,1/2+Z; <sup>3</sup>+X,1+Y,+Z; <sup>4</sup>+X,2-Y,1/2+Z; <sup>5</sup>+X,2-Y,-1/2+Z; <sup>6</sup>+X,-Y,-1/2+Z; <sup>7</sup>+X,-Y,1/2+Z

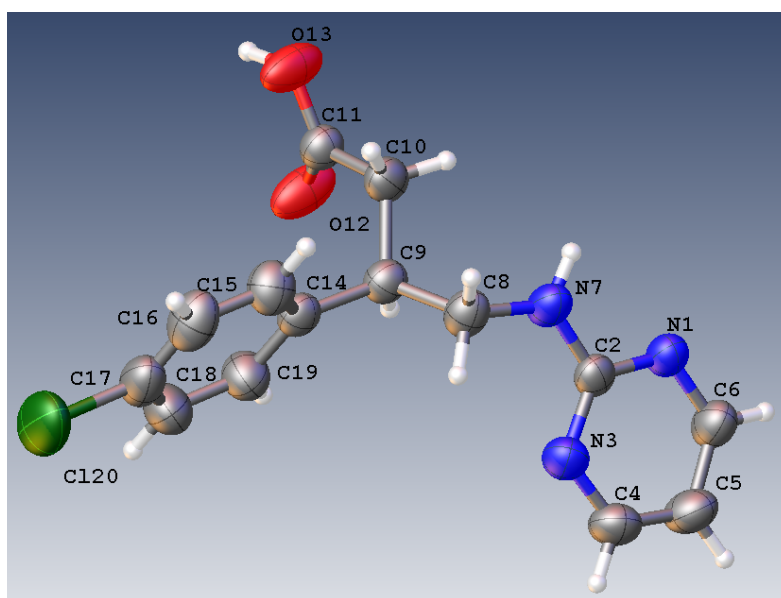

Fig. S2. ORTEP plot of compound **2** with atom numbering scheme

Table S2 Hydrogen Bonds for **2**.

| D   | H   | A                | d(D-H)/Å | d(H-A)/Å | d(D-A)/Å | D-H-A/° |
|-----|-----|------------------|----------|----------|----------|---------|
| N7  | H7  | O12 <sup>1</sup> | 0.86     | 2.14     | 2.922(2) | 150.3   |
| O13 | H13 | N1 <sup>2</sup>  | 0.96(4)  | 1.68(4)  | 2.633(2) | 170(3)  |

Symmetry codes: <sup>1</sup>3/2-X,1/2+Y,1/2-Z; <sup>2</sup>3/2-X,-1/2+Y,1/2-Z

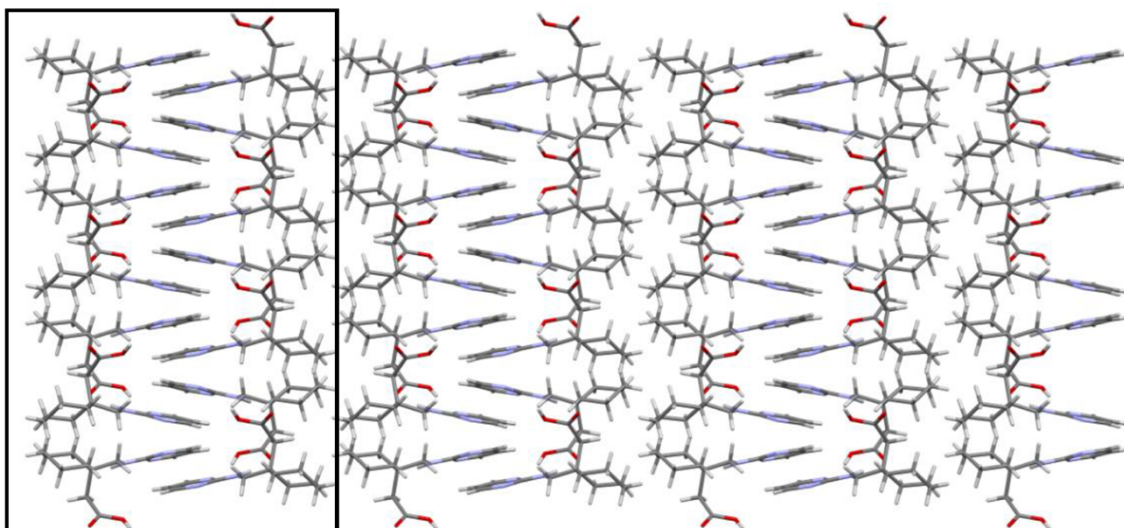

**Fig. S3.** Packing of compound 1

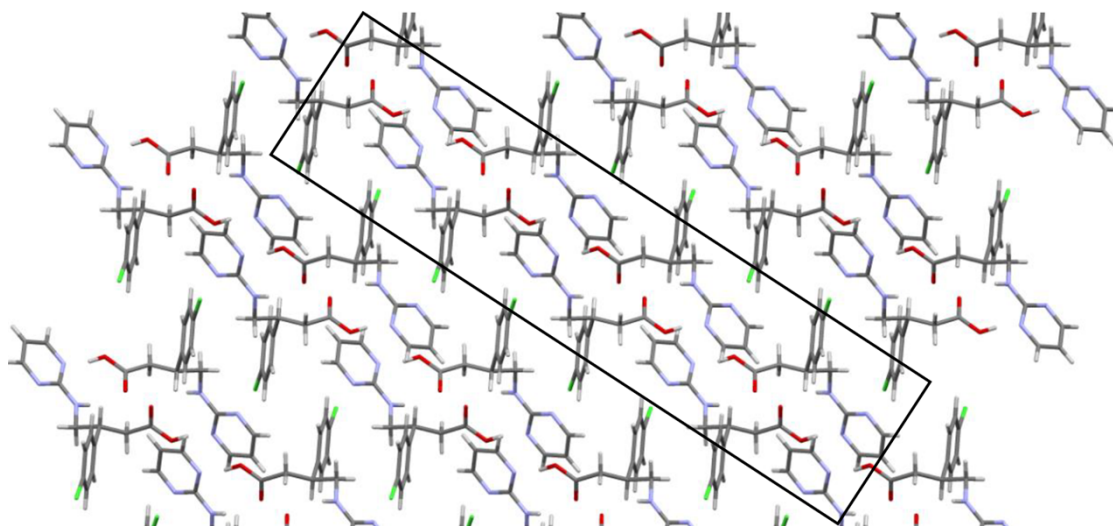

**Fig. S4.** 3D packing of compound 2
